# Supplementary material
Source: MDPI journal article supplement (https://www.mdpi.com/2072-4292/9/4/346)
Supplement: s1 [file s1]

# Supplementary

## (1) The equations of the four seasonal GWR models

The equations of the seasonal GWR model with auxiliary variables.

$$\text{Spring: } PM_{2.5(i,j)} = \beta_{0(i,j)}^1 + \beta_{1(i,j)}^1 AOD_{(i,j)} + \beta_{2(i,j)}^1 WS_{(i,j)} + \beta_{3(i,j)}^1 Vpre_{(i,j)} + \beta_{4(i,j)}^1 VSB_{(i,j)} \quad (1)$$

$$\text{Summer: } PM_{2.5(i,j)} = \beta_{0(i,j)}^2 + \beta_{1(i,j)}^2 AOD_{(i,j)} + \beta_{2(i,j)}^2 Elev_{(i,j)} + \beta_{3(i,j)}^2 Vpre_{(i,j)} + \beta_{4(i,j)}^2 VSB_{(i,j)} \quad (2)$$

$$\text{Autumn: } PM_{2.5(i,j)} = \beta_{0(i,j)}^3 + \beta_{1(i,j)}^3 AOD_{(i,j)} + \beta_{2(i,j)}^3 WS_{(i,j)} + \beta_{3(i,j)}^3 Temp_{(i,j)} + \beta_{4(i,j)}^3 VSB_{(i,j)} \quad (3)$$

$$\text{Winter: } PM_{2.5(i,j)} = \beta_{0(i,j)}^4 + \beta_{1(i,j)}^4 AOD_{(i,j)} + \beta_{2(i,j)}^4 Apre_{(i,j)} + \beta_{3(i,j)}^4 RH_{(i,j)} + \beta_{4(i,j)}^4 VSB_{(i,j)} \quad (4)$$

All the variable parameters are described in Table 1 of the manuscript and changes with location  $i$  on day  $j$ . the superscripts of  $\beta$  from 1 to 4 stand for the four different seasonal models: 1 is spring, 2 is summer, 3 is autumn and 4 is winter.  $\beta_{0(i,j)}^{1-4}$  denote the constant term of four seasonal model at location  $i$  on day  $j$  respectively for four seasons;  $\beta_{1-4(i,j)}^1$  are variable coefficients of location  $i$  on day  $j$  in spring model,  $\beta_{1-4(i,j)}^2$  are variable coefficients at location  $i$  on day  $j$  in summer model,  $\beta_{1-4(i,j)}^3$  are variable coefficients at location  $i$  on day  $j$  of autumn model,  $\beta_{1-4(i,j)}^4$  are variable coefficients at location  $i$  on day  $j$  of winter model.

## (2) The comparison of the autumn seasonal GWR model and yearly GWR model

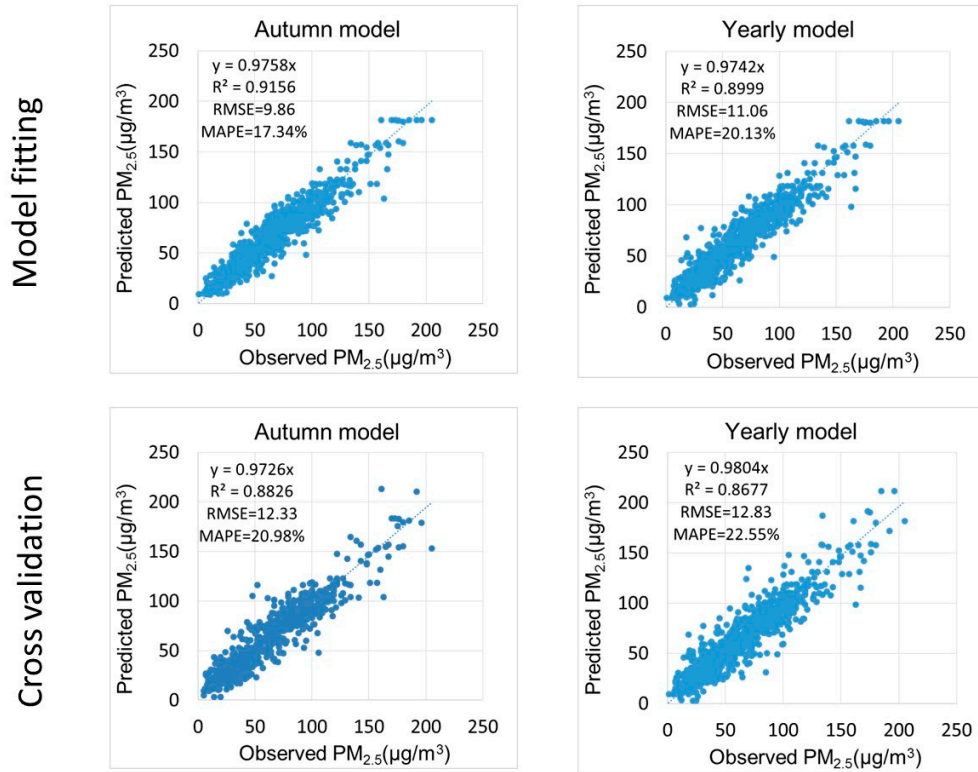

**Figure S1.** Comparison between observed  $PM_{2.5}$  and predicted  $PM_{2.5}$  from the autumn GWR model and the yearly model in 2013. The dashed lines are regression lines.

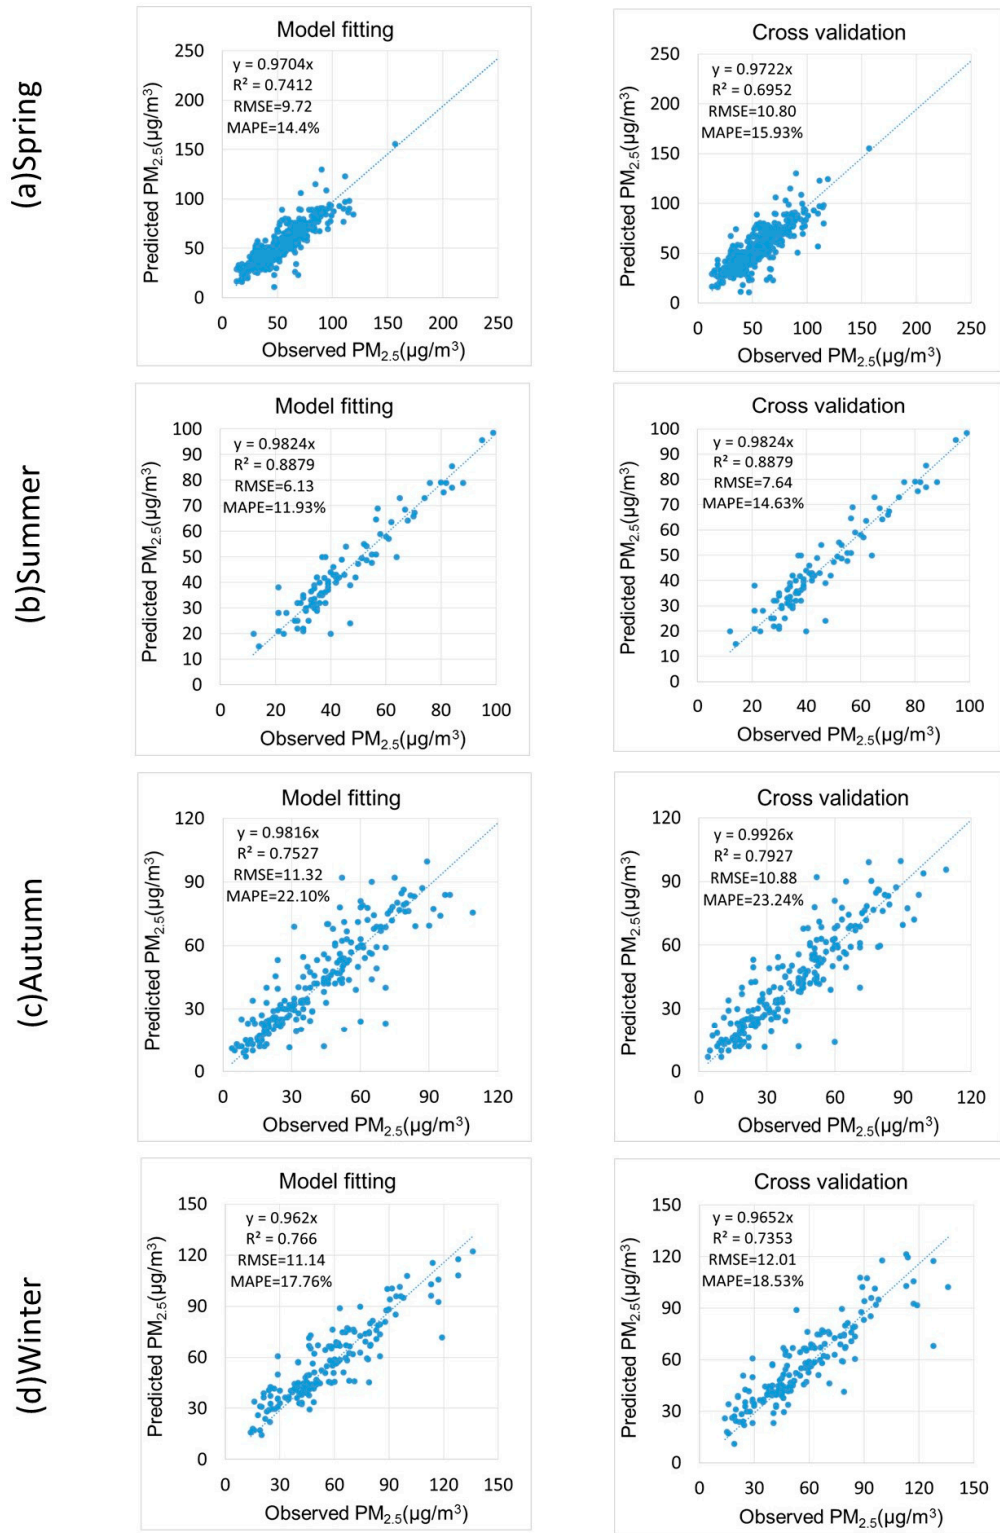

**Figure S2.** Comparison between observed  $PM_{2.5}$  and predicted  $PM_{2.5}$  concentrations in the four seasonal models of 2014. The dashed lines are regression lines.
